# Supplementary material for: The translational sciences clinic: From bench to bedside
Source: PubMed Central journal article supplement (PMC8057442; doi:10.1017/cts.2020.529), 2020-08-25
Supplement: S2059866120005294sup001.pdf [file S2059866120005294sup001.pdf]

# Translational Science Clinic Mentor Evaluation

This evaluation determines the student's grade for the course and must be discussed with them.

1) Student Type  MSTP  
 TL1  
 Other

2) Mentor First and Last Name \_\_\_\_\_

3) Student First and Last Name \_\_\_\_\_

4) Semester  Fall  
 Spring  
 Summer

5) Year \_\_\_\_\_

|                                                                                                                       | Strongly Agree        | Agree                 | Undecided             | Disagree              | Strongly Disagree     |
|-----------------------------------------------------------------------------------------------------------------------|-----------------------|-----------------------|-----------------------|-----------------------|-----------------------|
| 6) The student was able to effectively integrate current scientific literature into the diagnosis and treatment plan. | <input type="radio"/> | <input type="radio"/> | <input type="radio"/> | <input type="radio"/> | <input type="radio"/> |
| 7) The student conducted effective literature searches for the specific disease topic.                                | <input type="radio"/> | <input type="radio"/> | <input type="radio"/> | <input type="radio"/> | <input type="radio"/> |
| 8) The student displayed enthusiasm for integrating current research literature with clinical problems.               | <input type="radio"/> | <input type="radio"/> | <input type="radio"/> | <input type="radio"/> | <input type="radio"/> |
| 9) The student was able to conceptualize research questions that integrated current literature and disease states.    | <input type="radio"/> | <input type="radio"/> | <input type="radio"/> | <input type="radio"/> | <input type="radio"/> |
| 10) The student challenged you scientifically in an appropriate manner.                                               | <input type="radio"/> | <input type="radio"/> | <input type="radio"/> | <input type="radio"/> | <input type="radio"/> |

11) Overall Evaluation  Honors  
 Pass  
 Fail

12) Comments \_\_\_\_\_

# Translational Science Clinic Student Evaluation

1) Student Type  MSTP  
 TL1  
 Other

2) Student First and Last Name \_\_\_\_\_

3) Mentor First and Last Name \_\_\_\_\_

4) Semester  Fall  
 Spring  
 Summer

5) Year \_\_\_\_\_

|                                                                                                                                              | Strongly Agree        | Agree                 | Undecided             | Disagree              | Strongly Disagree     |
|----------------------------------------------------------------------------------------------------------------------------------------------|-----------------------|-----------------------|-----------------------|-----------------------|-----------------------|
| 6) My mentor challenged my understanding of the scientific literature.                                                                       | <input type="radio"/> | <input type="radio"/> | <input type="radio"/> | <input type="radio"/> | <input type="radio"/> |
| 7) I learned how to begin to integrate the latest scientific information into concepts of improving understanding and treatment of diseases. | <input type="radio"/> | <input type="radio"/> | <input type="radio"/> | <input type="radio"/> | <input type="radio"/> |
| 8) This elective helped me to begin to understand how to integrate basic science into clinical investigation.                                | <input type="radio"/> | <input type="radio"/> | <input type="radio"/> | <input type="radio"/> | <input type="radio"/> |
| 9) This has been a valuable experience.                                                                                                      | <input type="radio"/> | <input type="radio"/> | <input type="radio"/> | <input type="radio"/> | <input type="radio"/> |

10) Comments \_\_\_\_\_

---

13) I would be interested in mentoring another student in the future  Yes  
 No

---

14) I have discussed this evaluation with the student  Yes  
 No
